# Supplementary material for: Simulation of Hydrologic Change of Linggo Co during 1979–2012 Using Hydrologic and Isotopic Mass Balance Model
Source: MDPI journal article supplement (doi:10.3390/w15051004), 2023-03-06
Supplement: s1 [file s1]

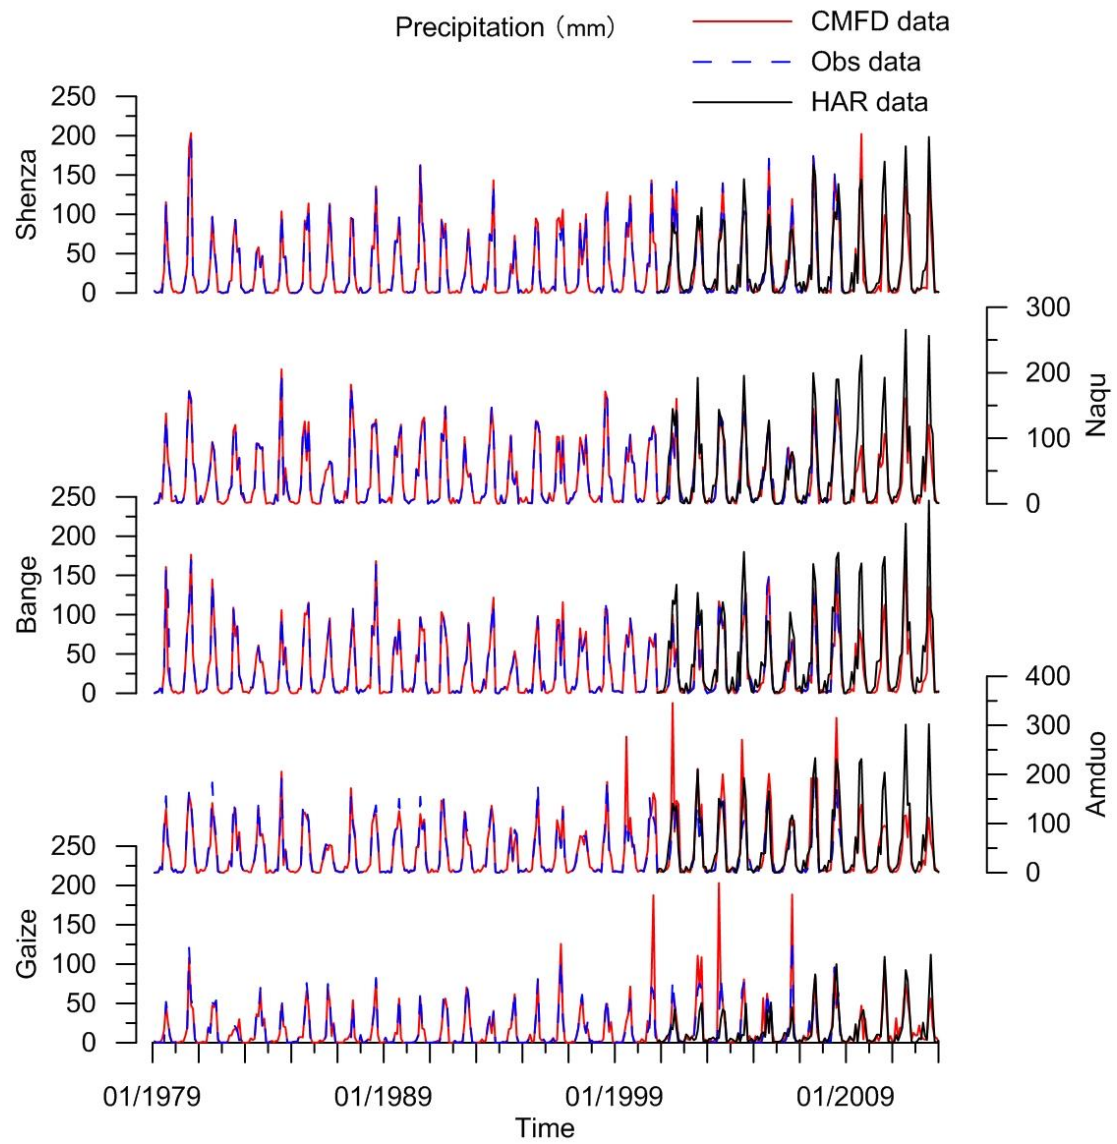

**Figure S1.** Comparisons of CMFD (red lines) and HAR (black lines) precipitation data with observed data (blue dots).

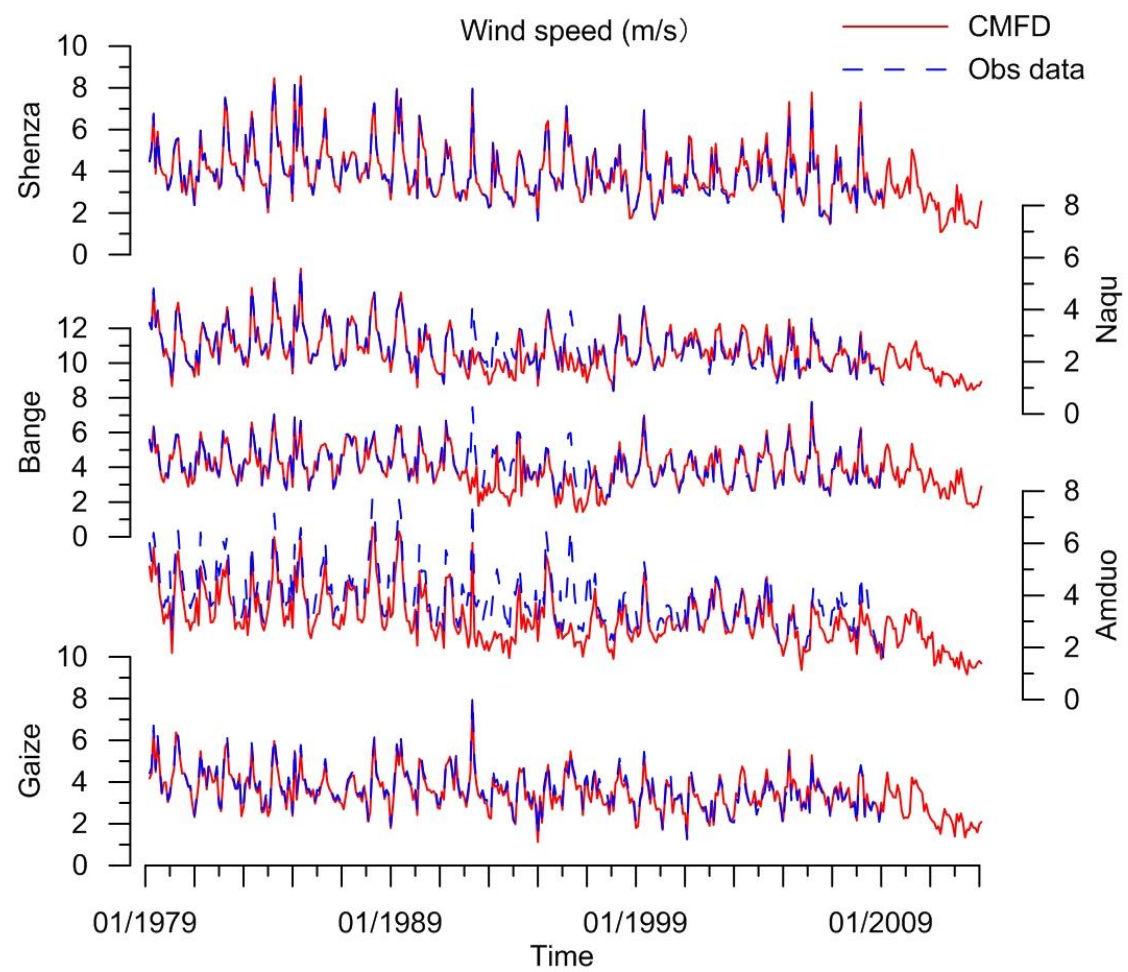

**Figure S2.** The comparison of CMFD wind speed data (red lines) with observed data (blue dots).

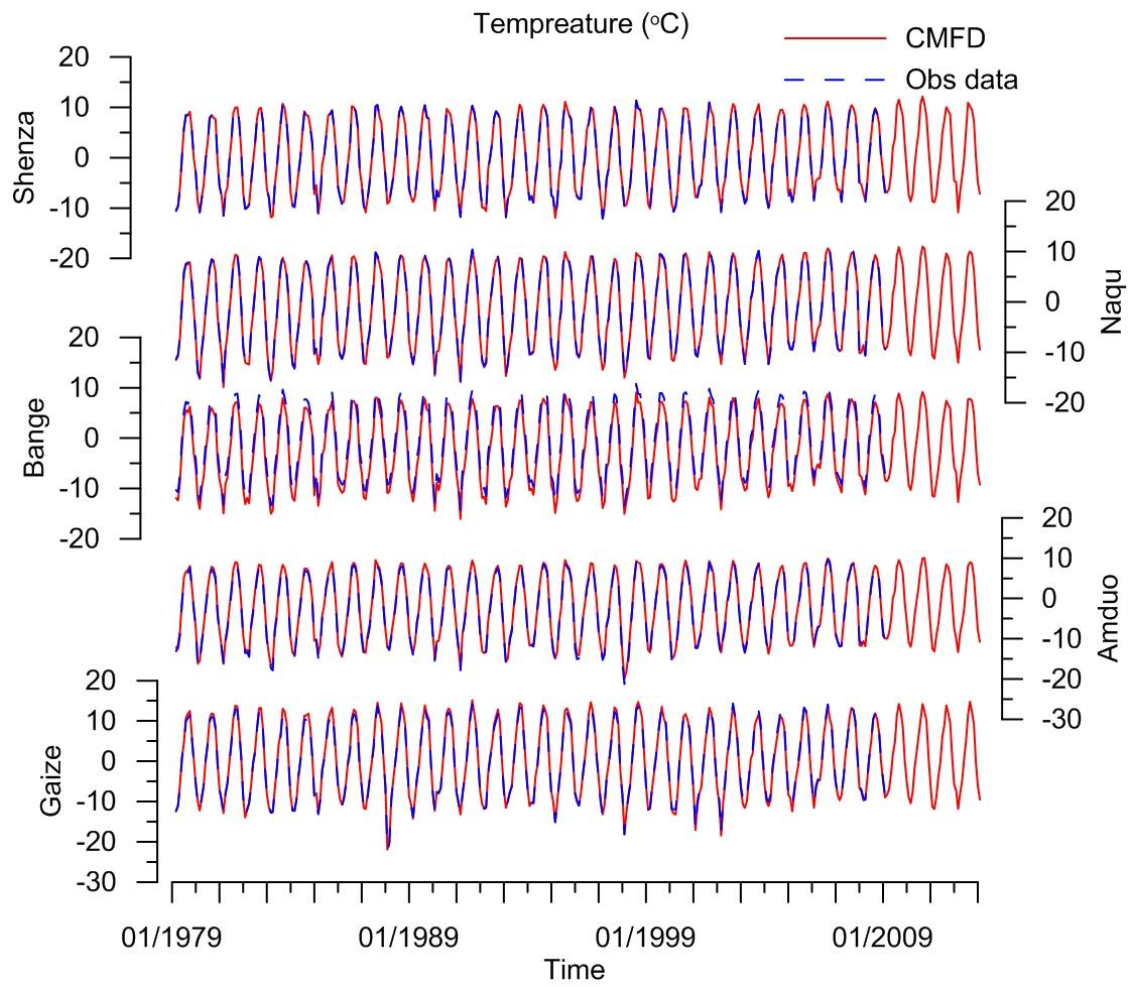

**Figure S3.** The comparison of CMFD temperature data (red lines) with observed data (blue dots).

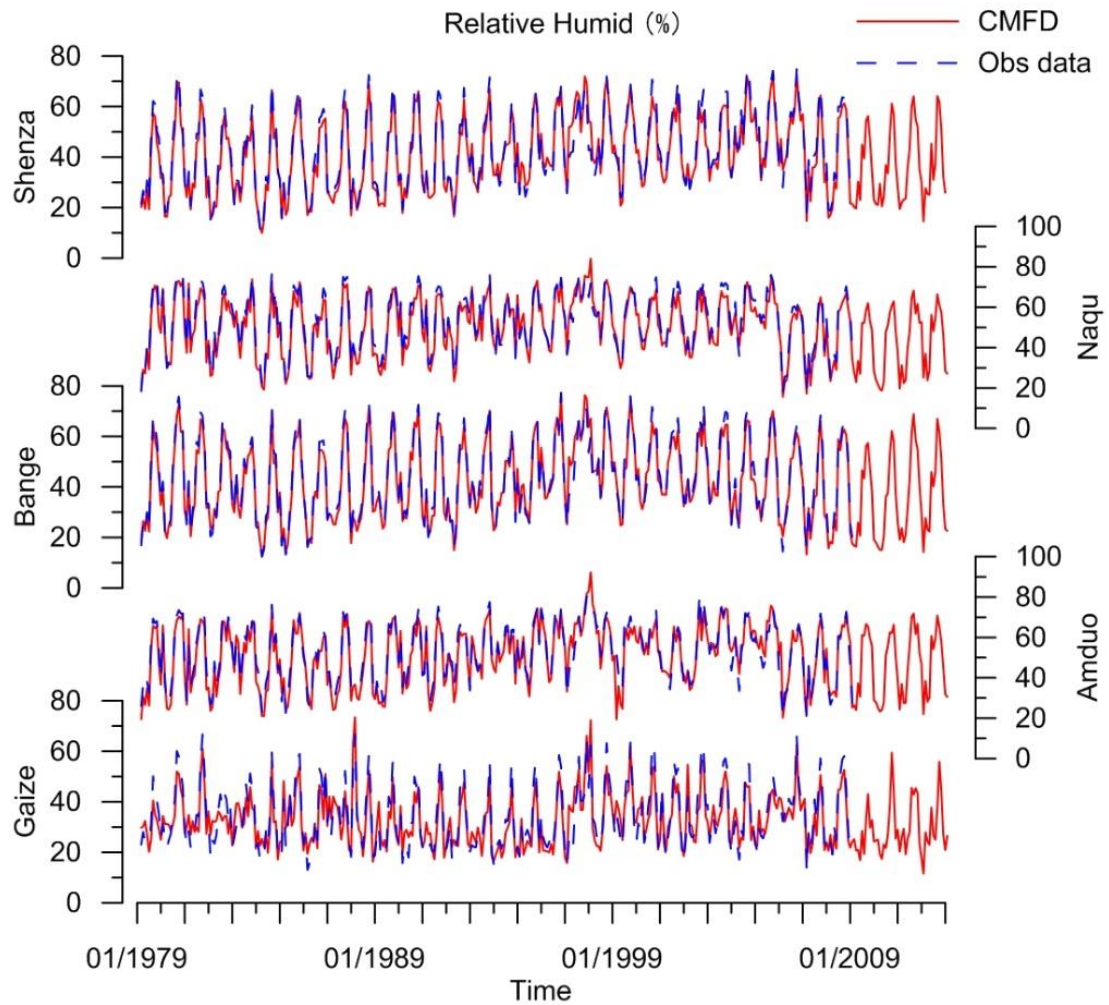

**Figure S4.** The comparison of CMFD relative humidity data (red lines) with observed data (blue dots).

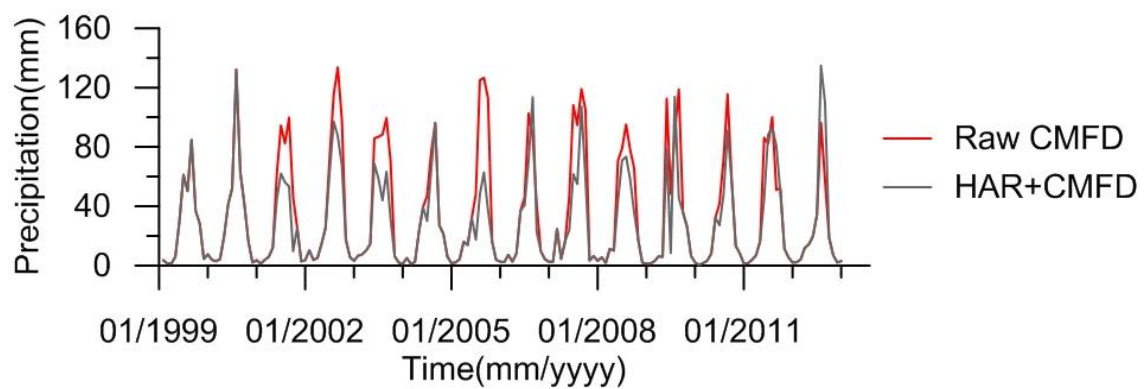

**Figure S5.** The comparison of combined CMFD and HAR data (gray lines) with raw CMFD data (red lines).

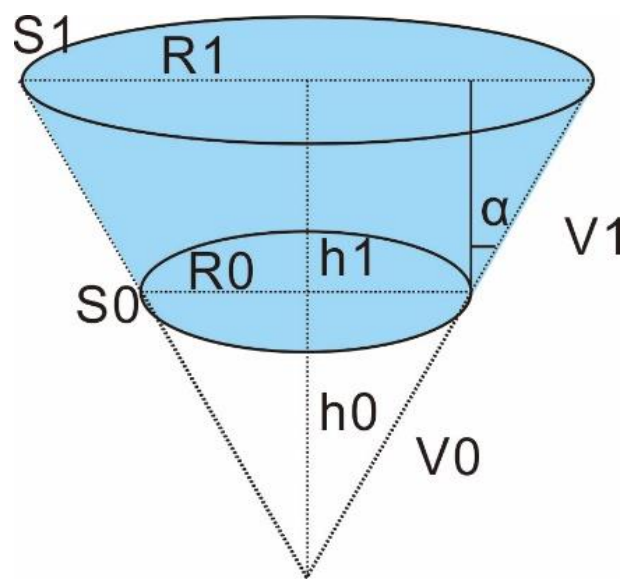

**Figure S6.** Simplified hypsographic profile of Linggo Co.

**Table S1.** Climatic parameters used in our lake model.

| Month                       | WS (m/s) | Ta (°C) | P (mm) | Lrad<br>(w/s) | Srad<br>(w/s) | RH<br>(%) |
|-----------------------------|----------|---------|--------|---------------|---------------|-----------|
| Jan.                        | 5.42     | -18.56  | 2.42   | 141.94        | 151.13        | 0.48      |
| Feb.                        | 5.83     | -15.99  | 2.90   | 153.34        | 183.51        | 0.48      |
| Mar.                        | 6.10     | -11.02  | 4.19   | 173.40        | 228.74        | 0.50      |
| Apr.                        | 5.09     | -5.75   | 10.05  | 196.70        | 274.97        | 0.51      |
| May                         | 4.53     | -0.80   | 30.73  | 222.34        | 304.99        | 0.52      |
| Jun.                        | 4.15     | 3.86    | 53.21  | 252.42        | 301.10        | 0.56      |
| Jul.                        | 3.75     | 6.47    | 75.11  | 271.17        | 280.28        | 0.59      |
| Aug.                        | 3.39     | 5.67    | 72.76  | 266.06        | 262.02        | 0.60      |
| Sept.                       | 3.76     | 2.19    | 45.40  | 239.02        | 239.57        | 0.57      |
| Oct.                        | 3.81     | -5.61   | 12.38  | 192.87        | 208.26        | 0.48      |
| Nov.                        | 4.17     | -12.83  | 2.65   | 158.61        | 171.09        | 0.46      |
| Dec.                        | 4.78     | -16.73  | 1.96   | 148.05        | 143.07        | 0.52      |
| Coefficient of<br>variation | 0.25     | 0.33    | 0.72   | 0.05          | 0.06          | 0.29      |
